# Supplementary material
Source: MDPI journal article supplement (https://www.mdpi.com/2071-1050/13/4/2192)
Supplement: s1 [file s1]

Supplement S1. Energy companies and their mission statements (all are given 'as is') considered in the present analysis. All companies are treated fully anonymously in the present study to avoid occasional violation of their reputation.

| Company                                                      | Country         | Mission statement (environmental issues are marked in bold)                                                                                                                                                                                                                                                                                                                                                                                                                                                                                                                                                                                                                                                                                                                                                                            |
|--------------------------------------------------------------|-----------------|----------------------------------------------------------------------------------------------------------------------------------------------------------------------------------------------------------------------------------------------------------------------------------------------------------------------------------------------------------------------------------------------------------------------------------------------------------------------------------------------------------------------------------------------------------------------------------------------------------------------------------------------------------------------------------------------------------------------------------------------------------------------------------------------------------------------------------------|
| <i>Top energy companies</i> (selection on the basis of [50]) |                 |                                                                                                                                                                                                                                                                                                                                                                                                                                                                                                                                                                                                                                                                                                                                                                                                                                        |
| A1                                                           | the Netherlands | * [company name]'s purpose is to power progress together with more and <b>cleaner energy solutions</b> . We believe that rising standards of living for a growing global population are likely to continue to drive demand for energy, including oil and gas, for years to come. At the same time, technology changes and <b>the need to tackle climate change</b> means there is a transition underway to a <b>lower-carbon</b> , multisource energy system.                                                                                                                                                                                                                                                                                                                                                                          |
| B2                                                           | USA             | Fueling the world safely and responsibly.<br>Access to energy underpins human comfort, mobility, economic prosperity and social progress. It touches nearly every aspect of modern life. Over the course of its long history of more than a century, [company name] has evolved from a regional marketer of kerosene to an advanced energy and chemical innovator, and one of the largest publicly traded companies in the world. An industry leader in almost every aspect of the energy and chemical manufacturing businesses, we operate facilities or market products in most of the world's countries, explore for oil and natural gas on six continents, and research and develop next-generation technologies to help meet the dual challenge of fueling global economies while addressing <b>the risks of climate change</b> . |
| C1                                                           | Russia          | to make the energy of natural resources serve the interests of mankind, to efficiently and responsibly develop the unique hydrocarbon fields entrusted to us by providing Company growth, the wellbeing of its employees and community at large.                                                                                                                                                                                                                                                                                                                                                                                                                                                                                                                                                                                       |
| D1                                                           | Russia          | [company name] views its mission as ensuring a reliable, efficient and balanced supply of natural gas, other energy resources and their derivatives to consumers.                                                                                                                                                                                                                                                                                                                                                                                                                                                                                                                                                                                                                                                                      |
| E1                                                           | France          | Meet demand for oil products worldwide.                                                                                                                                                                                                                                                                                                                                                                                                                                                                                                                                                                                                                                                                                                                                                                                                |
| F1                                                           | China           | Better energy for better living                                                                                                                                                                                                                                                                                                                                                                                                                                                                                                                                                                                                                                                                                                                                                                                                        |
| G1                                                           | USA             | It's not just what we do. It's how we do it.                                                                                                                                                                                                                                                                                                                                                                                                                                                                                                                                                                                                                                                                                                                                                                                           |
| H1                                                           | China           | <b>Supplying green energy</b> for our social development.<br>Implementing national policies, conducting national energy strategies and fueling the society with <b>green</b> and low-cost energy with high political and social responsibility. Conserving coal resources in the course of development, <b>protecting environment</b> , saving energy & <b>reducing emission and focusing on the construction of ecological civilization</b> .                                                                                                                                                                                                                                                                                                                                                                                         |
| I1                                                           | Germany         | * With a clear focus on two strong core businesses we aim to become the partner of choice for energy and customer solutions. We provide solutions for the new energy world and make sure that everything we do has a single focus - our customers. Whether they are individuals or families, big or small businesses, or even entire towns and cities.                                                                                                                                                                                                                                                                                                                                                                                                                                                                                 |
| J1                                                           | UK              | * Our purpose is reimagining energy for people and <b>our planet</b> . We want to help the world reach net zero and improve people's lives.                                                                                                                                                                                                                                                                                                                                                                                                                                                                                                                                                                                                                                                                                            |
| K1                                                           | Italy           | Sustainability is an essential part of our business and is integrated across all our operations.                                                                                                                                                                                                                                                                                                                                                                                                                                                                                                                                                                                                                                                                                                                                       |
| L1                                                           | Thailand        | To conduct integrated energy and petrochemical business as the nation's energy company whose mission is to equally respond to                                                                                                                                                                                                                                                                                                                                                                                                                                                                                                                                                                                                                                                                                                          |

|    |        |                                                                                                                                                                                                                                                                                                                                                                                                                                                                                                                                                                                                                                                                                                                                                                                                                                                                                                                                                                                                                                                                                                                                                   |
|----|--------|---------------------------------------------------------------------------------------------------------------------------------------------------------------------------------------------------------------------------------------------------------------------------------------------------------------------------------------------------------------------------------------------------------------------------------------------------------------------------------------------------------------------------------------------------------------------------------------------------------------------------------------------------------------------------------------------------------------------------------------------------------------------------------------------------------------------------------------------------------------------------------------------------------------------------------------------------------------------------------------------------------------------------------------------------------------------------------------------------------------------------------------------------|
|    |        | <p>all stakeholders through the following aspects:</p> <p>To the country<br/>Ensuring long-term energy security by providing adequate high-quality energy supply at fair prices to support economic growth.</p> <p>To community and society<br/>Maintaining a good standing corporate status in Thai society by <b>exercising environment stewardship of internationally accepted standards</b> and helping to improve the quality of life for the community and society.</p> <p>To shareholders<br/>Operating profitable business that leads to sustainable growth while generating optimum returns.</p> <p>To customers<br/>Ensuring customer satisfaction and loyalty by delivering world-class quality products and services at fair prices.</p> <p>To business partners<br/>Conducting fair business practice with all partners while promoting trust, relationship, and cooperation to expand business capability and increase efficiency in long-term business partnership.</p> <p>To employees<br/>Promoting capability building professionally and ensuring that employees' well-being is on the level with other leading companies.</p> |
| M1 | USA    | We're an industry leader that's creating jobs, generating economic benefits and investing in infrastructure across America.                                                                                                                                                                                                                                                                                                                                                                                                                                                                                                                                                                                                                                                                                                                                                                                                                                                                                                                                                                                                                       |
| N1 | Japan  | Harnessing the Earth's power for the common good and for the day-to-day life of each individual, we will contribute to the development of our communities and help to ensure a vibrant future through creation and innovation in energy, resources, and materials.                                                                                                                                                                                                                                                                                                                                                                                                                                                                                                                                                                                                                                                                                                                                                                                                                                                                                |
| O1 | USA    | To develop energy resources safely, profitably and responsibly to maximize value.                                                                                                                                                                                                                                                                                                                                                                                                                                                                                                                                                                                                                                                                                                                                                                                                                                                                                                                                                                                                                                                                 |
| P1 | Brazil | * Provide energy that ensures prosperity in an ethical, safe and competitive way.                                                                                                                                                                                                                                                                                                                                                                                                                                                                                                                                                                                                                                                                                                                                                                                                                                                                                                                                                                                                                                                                 |
| Q1 | USA    | *** [company name] strives to maintain the lowest possible operating cost structure that is consistent with prudent and safe operations. The company focuses on integrating technology such as 3D seismic, core analysis, and microseismic to develop proprietary petro-physical models.                                                                                                                                                                                                                                                                                                                                                                                                                                                                                                                                                                                                                                                                                                                                                                                                                                                          |
| R1 | Canada | Our purpose is to provide trusted energy that enhances people's lives, while caring for each other and <b>the earth</b> .                                                                                                                                                                                                                                                                                                                                                                                                                                                                                                                                                                                                                                                                                                                                                                                                                                                                                                                                                                                                                         |
| S1 | Spain  | To continue building together each day a healthier, more accessible energy model, based on electricity.                                                                                                                                                                                                                                                                                                                                                                                                                                                                                                                                                                                                                                                                                                                                                                                                                                                                                                                                                                                                                                           |
| T1 | Brazil | We put all our energy into the sustainable development of society.                                                                                                                                                                                                                                                                                                                                                                                                                                                                                                                                                                                                                                                                                                                                                                                                                                                                                                                                                                                                                                                                                |
| U1 | Japan  | The [company name]'s basic mission is to deliver electricity to society in a safe and stable manner. Based on this commitment, we will pursue new social and <b>environmental roles in "leading the low-carbon era"</b> as we contribute to creating affluent and comfortable lifestyles.                                                                                                                                                                                                                                                                                                                                                                                                                                                                                                                                                                                                                                                                                                                                                                                                                                                         |
| V1 | Spain  | to be an energy company committed to a sustainable world.                                                                                                                                                                                                                                                                                                                                                                                                                                                                                                                                                                                                                                                                                                                                                                                                                                                                                                                                                                                                                                                                                         |
| W1 | India  | To produce and market the planned quantity of coal and coal products efficiently and economically in <b>an eco-friendly manner</b> with due regard to safety, conservation and quality.                                                                                                                                                                                                                                                                                                                                                                                                                                                                                                                                                                                                                                                                                                                                                                                                                                                                                                                                                           |

|                                                                          |          |                                                                                                                                                                                                                                                                                                                                                                                                                                                                                                                                                                                                                                                                                                                                                                            |
|--------------------------------------------------------------------------|----------|----------------------------------------------------------------------------------------------------------------------------------------------------------------------------------------------------------------------------------------------------------------------------------------------------------------------------------------------------------------------------------------------------------------------------------------------------------------------------------------------------------------------------------------------------------------------------------------------------------------------------------------------------------------------------------------------------------------------------------------------------------------------------|
| X1                                                                       | Poland   | We discover and process natural resources to fuel the future.                                                                                                                                                                                                                                                                                                                                                                                                                                                                                                                                                                                                                                                                                                              |
| Y1                                                                       | USA      | [company name]'s mission is to be the leading diversified energy company - by providing reliable, <b>clean</b> , affordable and innovative energy products.                                                                                                                                                                                                                                                                                                                                                                                                                                                                                                                                                                                                                |
| <i>Fastest-growing energy companies</i> (selection on the basis of [51]) |          |                                                                                                                                                                                                                                                                                                                                                                                                                                                                                                                                                                                                                                                                                                                                                                            |
| A2                                                                       | USA      | *We provide <b>clean</b> , secure, and affordable energy to the world, while responsibly delivering a reliable, competitive, and integrated source of LNG, in a safe and rewarding work environment.                                                                                                                                                                                                                                                                                                                                                                                                                                                                                                                                                                       |
| B2                                                                       | USA      | ** A deep and overriding commitment to safety and <b>environmental responsibility</b> pervades our operations and broader organizational culture, as expressed in our Health, Safety, and Environmental Mission Statement.<br>At [company name] we conduct all aspects of our business in a healthy, safe, and <b>environmentally conscious manner</b> at our facilities and in the communities in which we operate. Health, safety, and <b>environmental stewardship</b> are integral to all operations, from acquisition or project design through construction, operation, and closure. We recognize that the ability to do business in any community is a privilege and, consequently, make health, safety, and <b>environmental stewardship</b> our first priorities. |
| C2                                                                       | USA      | The Company's mission is to be America's leading independent energy company, focused on value, safety, <b>the environment</b> , technology and our greatest asset, our people.                                                                                                                                                                                                                                                                                                                                                                                                                                                                                                                                                                                             |
| D2                                                                       | Turkey   | To guide the sector through accomplished innovation, and to supply the nation's petroleum products need.                                                                                                                                                                                                                                                                                                                                                                                                                                                                                                                                                                                                                                                                   |
| C2                                                                       | Belgium  | We deliver the infrastructure of the future and innovate in services that will pave the way to a reliable and sustainable electricity system, placing the community's interest at the heart of all our decisions.                                                                                                                                                                                                                                                                                                                                                                                                                                                                                                                                                          |
| E2                                                                       | USA      | At [company name], our mission is to empower our team to embrace and drive innovative change that creates long-term per share value for our investors, enhances our communities and delivers energy solutions for today and tomorrow.                                                                                                                                                                                                                                                                                                                                                                                                                                                                                                                                      |
| F2                                                                       | Thailand | 1. To secure continuous growth in order to maximize shareholder's value<br>2. To offer reliable energy supply & services<br>3. To be a good corporate citizen and be considerate to society and <b>environment</b>                                                                                                                                                                                                                                                                                                                                                                                                                                                                                                                                                         |
| G2                                                                       | USA      | * [company name] is built on a strategy that fits our strengths. We focus on hiring the best people and being a good business partner and member of our community, investing in high-quality assets in the Permian Basin, executing a returns-based capital program and maintaining a strong financial position. The consistency of our strategy enables Concho to deliver strong growth, differentiated value and quality returns year after year.                                                                                                                                                                                                                                                                                                                        |
| H2                                                                       | China    | The panel point of the national energy system, platform for cooperation of regional and relevant parties.                                                                                                                                                                                                                                                                                                                                                                                                                                                                                                                                                                                                                                                                  |
| I2                                                                       | USA      | *** [company name] strives to maintain the lowest possible operating cost structure that is consistent with prudent and safe operations. The company focuses on integrating technology such as 3D seismic, core analysis, and microseismic to develop proprietary petro-physical models.                                                                                                                                                                                                                                                                                                                                                                                                                                                                                   |
| J2                                                                       | China    | Developing <b>clean energy</b> to benefit mankind.                                                                                                                                                                                                                                                                                                                                                                                                                                                                                                                                                                                                                                                                                                                         |
| K2                                                                       | Canada   | *** To maximize the value of the company by responsibly developing oil and natural gas assets in a safe, innovative and efficient way                                                                                                                                                                                                                                                                                                                                                                                                                                                                                                                                                                                                                                      |

|    |                         |                                                                                                                                                                                                                                                                                                                                                                                                                                                                                                                                                                                                                                                                     |
|----|-------------------------|---------------------------------------------------------------------------------------------------------------------------------------------------------------------------------------------------------------------------------------------------------------------------------------------------------------------------------------------------------------------------------------------------------------------------------------------------------------------------------------------------------------------------------------------------------------------------------------------------------------------------------------------------------------------|
| L2 | China                   | Benefit Employees. Contribute to Society.                                                                                                                                                                                                                                                                                                                                                                                                                                                                                                                                                                                                                           |
| M2 | USA                     | * We are committed to maintaining and improving the safety, reliability and efficiency of our operations, which we believe to be key components in generating stable cash flows. We strive for operational excellence by utilizing [company name]'s existing programs to integrate health, occupational safety, process safety and <b>environmental principles</b> throughout our business with a commitment to continuous improvement. We will continue to employ [company name]'s rigorous training, integrity and audit programs to drive ongoing improvements in both personal and process safety as we strive for zero incidents.                              |
| N2 | Canada                  | To develop people to work together to create value for the Company's shareholders by doing it right with fun and integrity.                                                                                                                                                                                                                                                                                                                                                                                                                                                                                                                                         |
| O2 | India                   | We will become a Global Transmission Company with Dominant Leadership in Emerging Power Markets with World Class Capabilities by:<br>World Class: Setting superior standards in capital project management and operations for the industry and ourselves<br>Global: Leveraging capabilities to consistently generate maximum value for all stakeholders in India and in emerging and growing economies.<br>Inspiring, nurturing and empowering the next generation of professionals.<br>Achieving continuous improvements through innovation and state of the art technology.<br>Committing to highest standards in health, safety, security and <b>environment</b> |
| P2 | China<br>(Hong<br>Kong) | Benefiting the Society through Establishing a Harmonious Ambience                                                                                                                                                                                                                                                                                                                                                                                                                                                                                                                                                                                                   |
| Q2 | USA                     | *** To maximize cash flow from producing properties for reinvestment in drill-bit driven growth opportunities.                                                                                                                                                                                                                                                                                                                                                                                                                                                                                                                                                      |
| R2 | Saudi<br>Arabia         | Maximize shareholder value with our integrated resources in a sustainable, world-class manner.                                                                                                                                                                                                                                                                                                                                                                                                                                                                                                                                                                      |

Notes:

\* mission-like statement, but not designated as mission on the corporate web-page;

\*\* incomplete mission statement;

\*\*\* mission not taken from the official company web-page.
